# Supplementary material for: Development of Immunochromatographic Test Kit for Rapid Detection of Specific IgG4 Antibody in Whole-Blood Samples for Diagnosis of Human Gnathostomiasis
Source: MDPI journal article supplement (doi:10.3390/diagnostics11050862), 2021-05-11
Supplement: s1 [file s1]

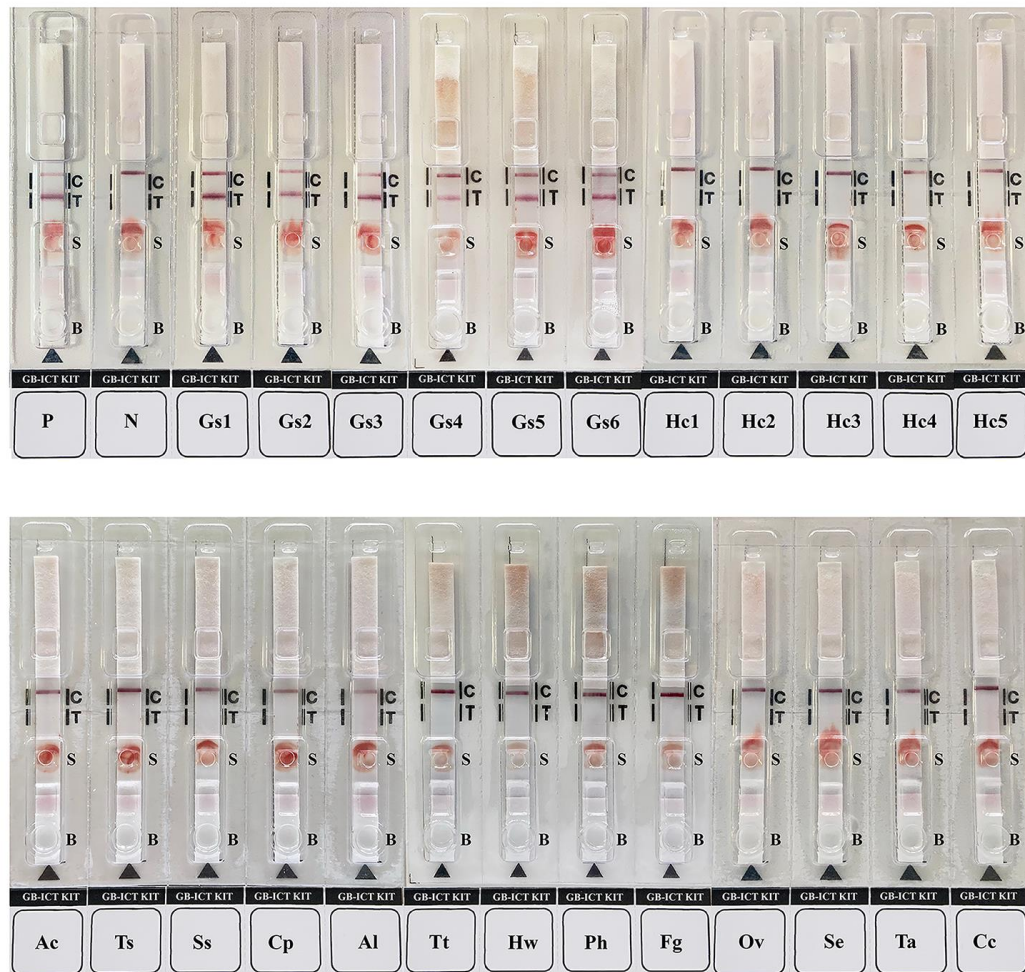

**Figure S1.** Representative images of anti-*Gnathostoma* IgG4 antibody detected in simulated whole-blood samples (WBSs) by the gnathostomiasis blood immunochromatographic test (GB-ICT) kit. C, control line; T, test line; S, sample well; B, buffer well; P, pooled positive control; N, pooled negative control; Gs1–Gs6, gnathostomiasis; Hc1–Hc5, healthy volunteers; Ac, angiostrongyliasis cantonensis; Ts, trichinellosis spiralis; Ss, strongyloidiasis; Cp, capillariasis philippinensis; Al, ascariasis; Tt, trichuriasis; Hw, hookworm infections; Ph, paragonimiasis heterotremus; Fg, fascioliasis gigantica; Ov, opisthorchiasis viverrini; Se, sparganosis; Ta, taeniasis saginata; Cc, cysticercosis.
